# Supplementary material
Source: MDPI journal article supplement (https://www.mdpi.com/2227-7102/9/4/292)
Supplement: s1 [file s1]

## Supplemental Materials. Cognitive Task Analysis Methodology and Example

There are five general steps in cognitive task analysis (CTA, discussed in Clark et al. 2008; p.580). The table below lists these steps and describes the contributions to each step from the subject matter experts (co-authors on this manuscript working in the domains of bioinformatics and bioinformatics education), the relevant theory, and from the literature.

| CTA steps <sup>1</sup> :                                | Subject Matter Experts                                                                                                                                                                                                                                    | Theoretical contributions | From the literature                                                                    |
|---------------------------------------------------------|-----------------------------------------------------------------------------------------------------------------------------------------------------------------------------------------------------------------------------------------------------------|---------------------------|----------------------------------------------------------------------------------------|
| 1. Collect preliminary knowledge/information            | SME (CR, CG, RET) parsing stewardship definition; evaluation of Blooms-level requirements (RET)                                                                                                                                                           | Bloom et al. Messick      | Standard setting models and methods (Cizek 2012)                                       |
| 2. identify knowledge representations and organizations | Guild structure; career stage (stages of degrees)                                                                                                                                                                                                         | Bloom's, Messick          | Stewardship literature; Ethical Guidelines statements                                  |
| 3. elicit knowledge                                     | Performance standard setting                                                                                                                                                                                                                              | Bloom's, Messick          | curriculum & training/workforce development considerations across educational contexts |
| 4. analyze and verify data                              | SMEs engage in iterative range-finding, pinpointing, alignment of KSAs, stages, and other PLDs; validation with alignment of KSAs and guidelines. Iterative and ongoing analysis and revisions of PLDs by all co-authors for observability and relevance. |                           |                                                                                        |
| 5. Format results                                       | Following format for MR construct; SME iteration on PLDs to insure clarity and relevance.                                                                                                                                                                 |                           |                                                                                        |
| <sup>1</sup> Adapted from Clark et al. 2008; p.580      |                                                                                                                                                                                                                                                           |                           |                                                                                        |
